# Supplementary material for: Models for the Evolution of GC Content in Asexual Fungi Candida albicans and C. dubliniensis
Source: PubMed Central journal article supplement (PMC3845650; doi:10.1093/gbe/evt170), 2013-10-31
Supplement: supp_evt170_Figure_S1.pdf [file supp_evt170_Figure_S1.pdf]

**A***C. albicans*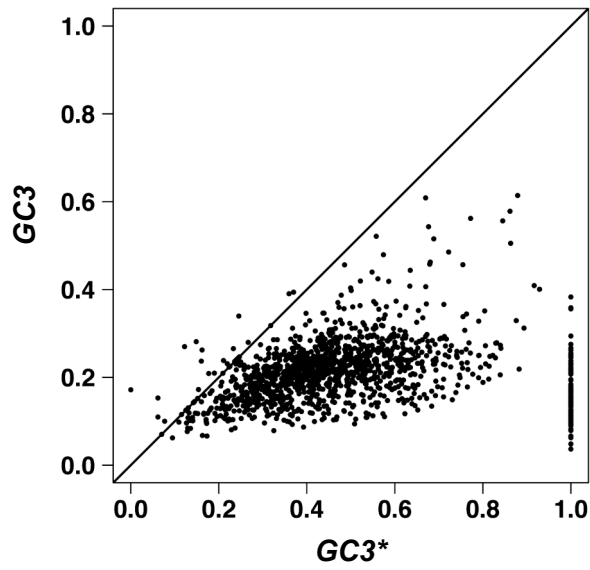**B***C. dubliniensis*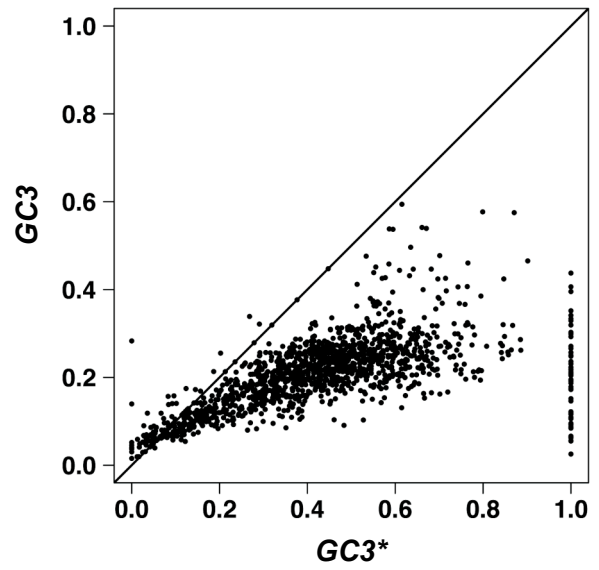

**Supplementary Figure S1.** The present GC3 content of fourfold degenerate codons, GC3, is plotted as a function of their equilibrium GC3 content, GC3\*. The solid lines correspond to the linear equation  $x = y$ .
