# Supplementary material for: Models for the Evolution of GC Content in Asexual Fungi Candida albicans and C. dubliniensis
Source: PubMed Central journal article supplement (PMC3845650; doi:10.1093/gbe/evt170), 2013-10-31
Supplement: supp_evt170_Figure_S2.pdf [file supp_evt170_Figure_S2.pdf]

**A***C. albicans*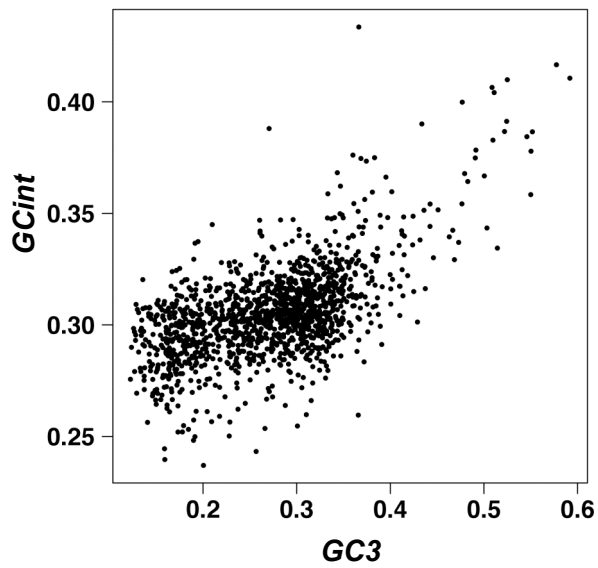**B***C. dubliniensis*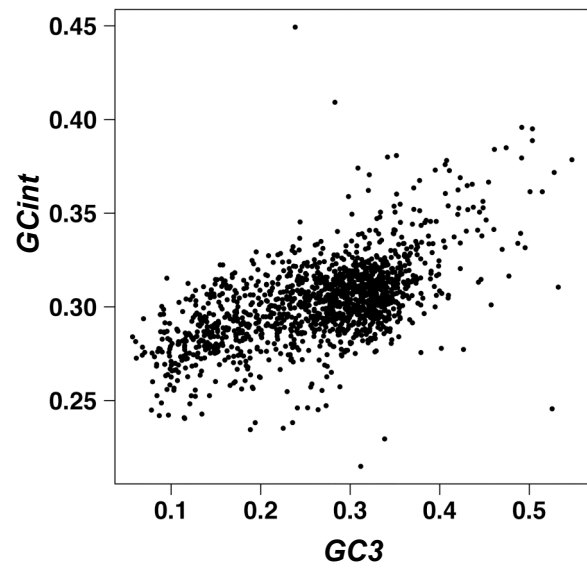

**Supplementary Figure S2.** The GC content of intergenes, *GCint*, is plotted as a function of the GC3 content, *GC3*, for *Candida albicans* (A) and for *Candida dubliniensis* (B).
